# Supplementary material for: Ribosome quality control is a central protection mechanism for yeast exposed to deoxynivalenol and trichothecin
Source: PubMed Central journal article supplement (PMC4888481; doi:10.1186/s12864-016-2718-y), 2016-06-01

Figure S1

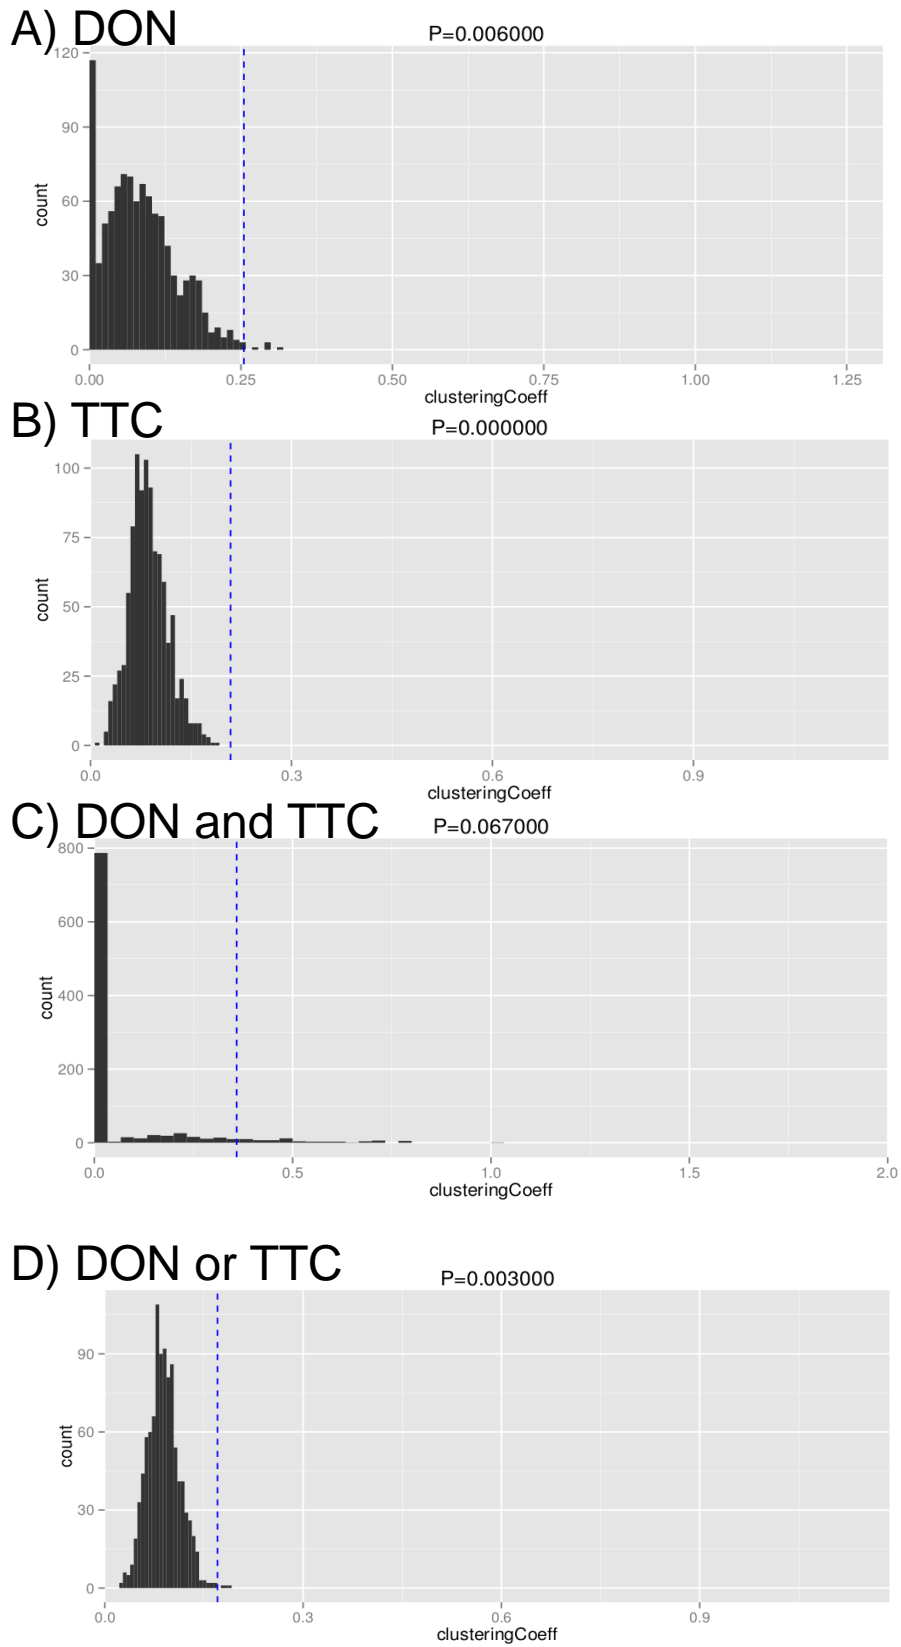

Supplement: 12864_2016_2718_MOESM6_ESM.pdf [file 12864_2016_2718_MOESM6_ESM.pdf]
